# Supplementary material for: CRL2Lrr1 promotes unloading of the vertebrate replisome from chromatin during replication termination
Source: PubMed Central journal article supplement — Genes Dev. 2017 Feb 1;31(3):275–90. doi: 10.1101/gad.291799.116 (PMC5358724; doi:10.1101/gad.291799.116), 2017-02-01
Supplement: supp_gad.291799.116_Supplemental_Fig_S4.pdf [file supp_gad.291799.116_Supplemental_Fig_S4.pdf]

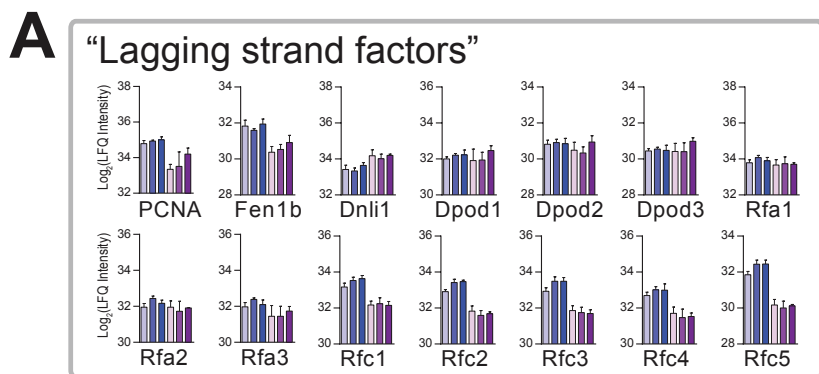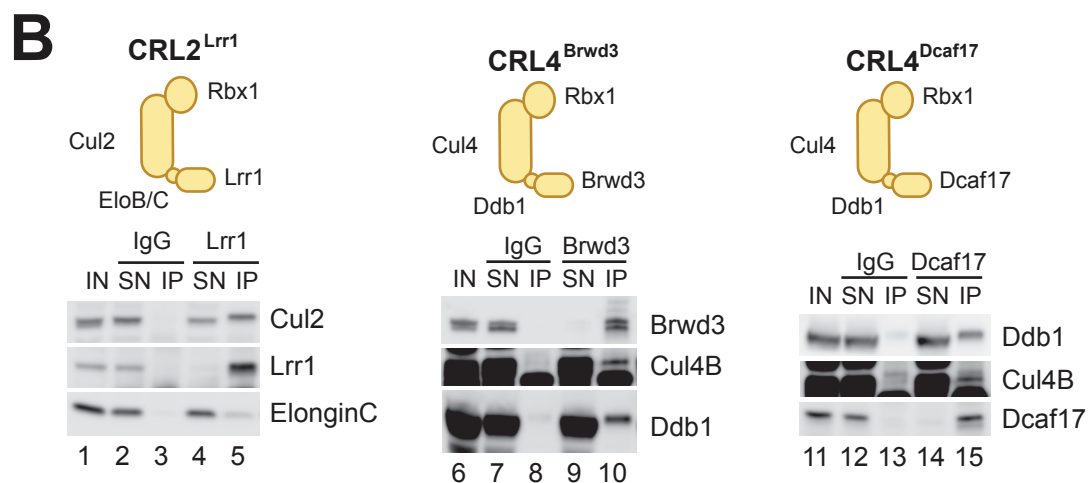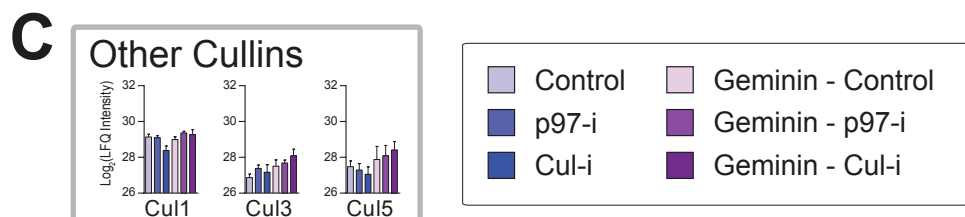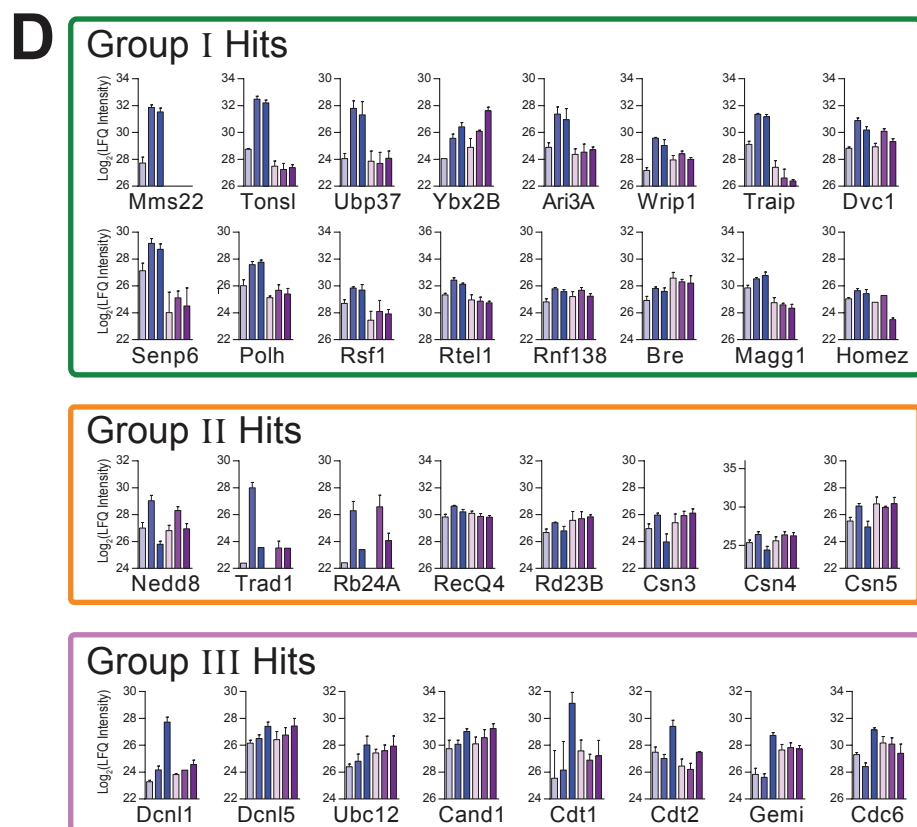

**Figure S4: Additional validation of the CHROMASS analysis**

**A.** As in Figure 2C but for proteins associated with lagging strand synthesis: PCNA, Fen1b, DNA Ligase 1 (Dnli1), DNA Pol  $\delta$  (Dpod1, Dpod2, Dpod3), RPA (Rfa1, Rfa2, Rfa3), and RFC (Rfc1-5).

**B.** Immunoprecipitation of Cullin ligases that were hits in the CHROMASS screen. Cartoons indicate the expected composition of CRL2<sup>Lrr1</sup>, CRL4<sup>Dcaf17</sup>, and CRL4<sup>Brwd3</sup>. Antibodies against the substrate adapters Lrr1, Dcaf17, and Brwd3 were used to carry out immunoprecipitations (IPs), which were analyzed by Western blotting. IPs of Lrr1 co-IP'd the adapter Elongin C and the Cullin Cul2 (Lane 5). IPs of Dcaf17 and Brwd3 co-IP'd the adapter Ddb1 and the Cullin Cul4b (Lanes 10 and 15). IPs performed with control IgGs (Lanes 3, 8, 13) failed to detect Elongin C, Cul2, Ddb1, or Cul4. Therefore, complexes of Cul2-Elongin C-Lrr1, Cul4-Ddb1-Dcaf17, and Cul4-Ddb1-Brwd3 exist in extract, supporting the existence of CRL2<sup>Lrr1</sup>, CRL4<sup>Dcaf17</sup>, CRL4<sup>Brwd3</sup>.

**C.** As in Figure 2E, but for the remaining Cullin scaffolds detected: Cul1, Cul3, and Cul5.

**D.** As in Figure 2C, but for additional Group I, II, and III hits.
