# Supplementary material for: CRL2Lrr1 promotes unloading of the vertebrate replisome from chromatin during replication termination
Source: PubMed Central journal article supplement — Genes Dev. 2017 Feb 1;31(3):275–90. doi: 10.1101/gad.291799.116 (PMC5358724; doi:10.1101/gad.291799.116), 2017-02-01
Supplement: supp_gad.291799.116_Supplemental_Fig_S5.pdf [file supp_gad.291799.116_Supplemental_Fig_S5.pdf]

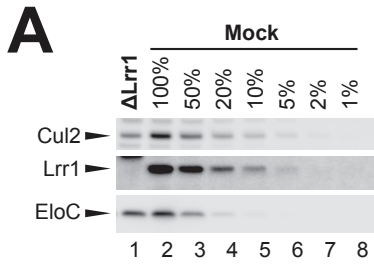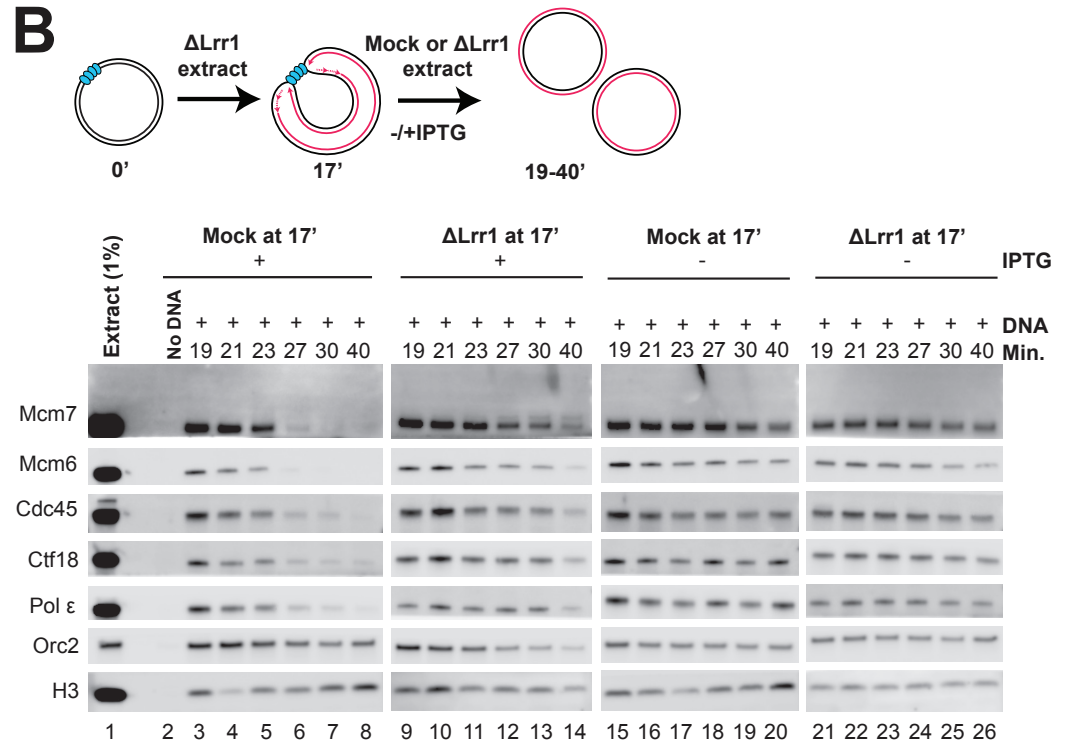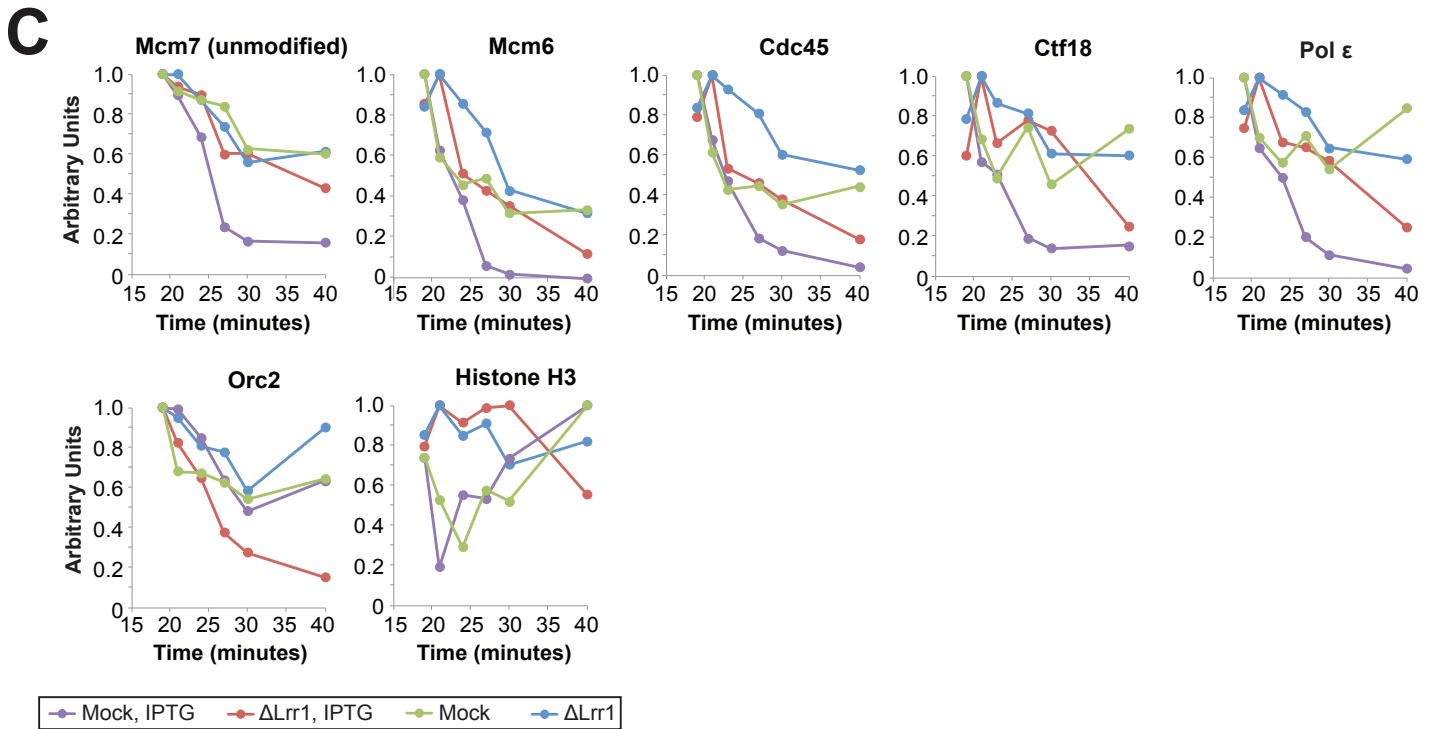

**Figure S5: Depletion of Lrr1 inhibits replisome disassembly**

**A.** Mock-depleted (Mock) and Lrr1-depleted ( $\Delta$ Lrr1) extracts were blotted with Cul2, Lrr1, and Elongin C (EloC) antibodies. The bands corresponding to Cul2, Lrr1, and Elongin C are marked with arrow heads. Over 95% of Lrr1 was depleted.

**B.** p[*lacOx32*] was incubated with LacR, then replicated in Lrr1-depleted extracts ( $\Delta$ Lrr1) from (A) until forks converged upon the LacR array. At 17 minutes, IPTG was added to induce termination (or withheld to maintain the block) along with mock-depleted or Lrr1-depleted extracts. Chromatin-bound proteins were recovered by plasmid pull-down at time points between 19 and 40 minutes and analyzed by Western blotting using antibodies against Mcm7, Mcm6, Cdc45, Ctf18, Pol  $\epsilon$ , Orc2, and Histone H3 (H3). Orc2 served as a loading control for the Mcm7 blot, and Histone H3 served as a loading control for the other blots.

**C.** Quantification of Mcm7, Mcm6, Cdc45, Ctf18, Pol  $\epsilon$ , Orc2, and Histone H3 recovery from the Western blots in (B), as described in methods.
